# Supplementary material
Source: PubMed Central journal article supplement (PMC3501249)
Supplement: NIHMS420539-supplement-01.pdf [file NIHMS420539-supplement-01.pdf]

**eTable 1.** Vitamins and minerals contained in the Centrum Silver formulation used in the Physicians' Health Study II trial.

| <b>Vitamin or mineral</b> | <b>Amount</b> |
|---------------------------|---------------|
| Vitamin A (IU)            | 5000*         |
| Vitamin C (mg)            | 60            |
| Vitamin D (IU)            | 400           |
| Vitamin E (IU)            | 45            |
| Vitamin K (µg)            | 10            |
| Thiamin (mg)              | 1.5           |
| Riboflavin (mg)           | 1.7           |
| Niacin (mg)               | 20            |
| Vitamin B6 (mg)           | 3             |
| Folic Acid (µg)           | 400           |
| Vitamin B12 (µg)          | 25            |
| Biotin (µg)               | 30            |
| Pantothenic Acid (mg)     | 10            |
| Calcium (mg)              | 200           |
| Iron (mg)                 | 4             |
| Phosphorus (mg)           | 48            |
| Iodine (µg)               | 150           |
| Magnesium (mg)            | 100           |
| Zinc (mg)                 | 15            |
| Selenium (µg)             | 20            |
| Copper (mg)               | 2             |
| Manganese (mg)            | 3.5           |
| Chromium (µg)             | 130           |
| Molybdenum (µg)           | 160           |
| Chloride (mg)             | 72.6          |
| Potassium (mg)            | 80            |
| Boron (µg)                | 150           |
| Nickel (µg)               | 5             |
| Vanadium (µg)             | 10            |
| Silicon (mg)              | 2             |

\* 50% as beta-carotene
